# Supplementary material
Source: Frontiers journal article supplement (https://www.frontiersin.org/articles/546903)
Supplement: Table_2.XLSX [file Table_2.XLSX]

## Sheet: Food web and ecosystem indices
Index / Food web attribute	Description	Short reference
(Average) trophic level	A dimensionless index based on Lindeman's concept of trophic levels.	Lindeman 1942
Ascedency / Capacity of development	Describes ecosystem order, the inverse represents entropy.	Christensen 1995
Ascendency	A measure of the size and the organizational status of the network of exchanges that occur in an ecosystem.	Ulanowicz 1980
Assortativity coefficient	Correlation between the degree (i.e. the number of connections) of two neighboring nodes.	Newman 2002
Average Mutual Information Index	Reflects to the decrease of uncertainty about the organisational level of an ecosystem	Ulanowicz 1995
Average path length	The average number of steps that a unit of flux will experience within the food web, from entry to exit (Kay et al., 1989). It is another way to measure retention capability within the food web.	Kay et al. 1989
Average residence time of energy in the system (ART)	A measure of the time elapsed between a unit of energy entering the system and leaving it again.	Christensen 1995
Bottom-up component of the keystone index	Quantifies the role of each species in order to explore possible relationships between the most important and the harmful groups in a community.	Jordán et al. 1999
Closeness centrality index	It is based on the proximity principle and quantifies how short the minimal paths from a given node to all other nodes are.	Wasserman & Faust 1994
Clustering coefficient	Probability that two taxa linked to the same taxa are also linked.	Watts & Strogatz 1998
Connectance	The number of the connections of any possible links between two compartments. The food web connectance considers only the transfer between the living compartments.	Gardner & Ashby 1970
Cummulative relative biomass trophic level spectrum (BTLS)	An ecosystem indicator of multifactor impacts	Sosa-Lopez et al. 2005
Detrivory / Herbivory	Measures the relative importance of detrivory and herbivory activity in a given system.	Ulanowicz 1986
Development capacity	A measure of the potential of an ecosystem to develop. An increase in capacity could mean the system has become less mature.	Kay et al. 1989
Diet discontinuity	Number of triplets of species with an "irreducible gap" (measure of intervality).	Stoufer et al. 2006
Directed connectance	The proportion of links out of the maximum number of possible directed links in a food web, including cannibalism and predation.	Martinez 1991
Ecosystem Reorganization Index	It approximates ecosystem resilience by measuring the extent to which pertubations cause changes in the relative biomass of individual functional groups.	Folke et al. 2004
Ecosystem-Based Quality Index (reef-EBQI)	Assessment of the quality of the functioning of the algae-dominated rocky reef ecosystem of the Mediterranean Sea.	Thibault et al. 2017
Ecotrophic efficiency	The proportion of the production that is exported out of the ecosystem or consumed by predators within it.	Christensen & Pauly 1992
Effective trophic position (ETP)	A weighted average of trophic steps of a living compartment to the primary producers or non-living compartments.	Wulff et al. 1989
Electivity index	An index of prey selection.	Jacobs 1974; Christensen & Pauly 1992
Finn's cycling index	It expresses the percentage of total through put (sum of all flows in a system) that is actually recycled. It is a measure of ecosystem retentiveness and can be related to ecosystem maturity.	Finn 1976
Finn's mean path length	Represents the average number of compartments that a unit of inflow goes through before leaving the food web, and is expected to grow with ecosystem maturity in response to increased flow and species diversity, connectedness and cycling.	Finn 1976
Flow diversity	A measure of homogeneity in terms of number and evenness of interactions	Baird et al. 1998
Food web efficiency	The production at the highest trophic level divided by the production at the basal level.	Berglund et al. 2007
Food web length
Footprint of a biotic group	The fraction of total production in the ecosystem required to support that group.	Ruzicka et al. 2012
Generality	The mean number of prey species per predator species. An index that is used to assess modifications of trophic network at species level.	Schoener 1989
Hurlbert response index	Refers to changes on average population sizes, measuring the sensitivity of the system to specific disturbing components.	Hurlbert 1997
Indegree popularity	The total number of other predators who are also preying on the prey of a specific predator.	Johnson et al. 2009
Interaction strength index	Quanitifes how strong the interactions of each group in the web is by measuring the effect that a change of biomass of one group has on the combined biomass of other groups in a system.	Shannon & Cury 2004
Internal capacity of development	Measures the maximal possible ascendency.	Ulanowicz 1986
Internal flow overhead (redundancy)	Indicator of stability and resilience.	Ulanowicz 1986
Isotopic niche space	A measure of diet breadth of the community under study	Layman et al. 2007
Keystoneness index	Identifies keystones, i.e. groups having a disproportionately high overall effect on other groups of the system with respect to their biomass.	Libralato et al. 2006
Lindeman spine length	It maps the complicated networks of the ecosystem's flows into a common topological form that allows distinct ecosystems to be compared. A linear chain that sums up all the information of a complex trophic network by dividing the compartments and their activity into discrete levels, the first level being composed of both primary producers and detritus.	Ulanowicz 1995
Linkage density (or complexity)	The average number of feeding links per species.	Montoya et al. 2006
Loss in production index	Quantifies the theoretical depletion in secondary production due to fishing.	Libralato et al. 2008
Maximum trophic level
Mean abundance
Mean biomass longevity	Measures changes in prevalence of functional groups with slow biomass turnover.	Christensen & Walters 2004
Mean food chain length	The average of the shortest trophic level and the mean trophic level of the consumer's resources.	Hairston et al. 1960
Mean transfer efficiency	The energy transferred from a trophic level to the next trophic level through consumption.	Lindeman 1942
Mean trophic index	Expresses the position of organisms within the food webs that largerly define aquatic ecosystems.	Christensen & Pauly 1992
Mean trophic level of catch	Quantifies the contribution of a specific taxonomic group to the total catch for a specific time. Decreases in the mean trophic level of fishery catches have been used to infer reductions in the abundance of high trophic level species caused by fishing pressure.	Pauly et al. 1998
Mean trophic level of ecosystem
Mean trophic level of landings	This index has been proposed as an indicator of major changes in the structure of marine food webs, as it provides information on the loss of top predators.	Pauly et al. 1998; Ward & Myers 2005
Mixed trophic impact routine	Shows the direct and indirect impacts (i.e. both predatory and competitive interactions) that a very small increase in the biomass of a group has on other groups of the system.	Ulanowicz & Puccia 1990; Libralato et al. 2006
Modularity	Measures the fraction of links falling within modules minus the expected value in an equivalent network, where links are placed at random.	Guimera & Amaral 2005
Nestedness	The extent to which species with few connections share their interaction partners with more highly connected species.	Bascompte et al. 2006
Net primary production efficiency		Christensen & Pauly 1992
Niche overlap index	The percentage overlap of stomach contents between species and within species over two survey periods.	Hulbert 1978
Number of trophic links	The number of directed feeding links between taxa.	Cohen & Briand 1984
Ocean health index	Evaluates the health of a marine ecosystem not only in the marine life conservation, but also in the human uses of the oceans. The index is a quantitative evaluation by considering the aspects of marine life conservation, human uses of ocean as well as the negative and the positive impacts on the ocean.	Halpern et al. 2012
Outdegree	The number of prey species eaten by a specific predator.	Johnson et al. 2009
Overal homeostasis	Quantifies the balance of an ecosystem.	Odum 1969
Pelagic / Demersal catch	It is defined as the ratio of pelagic species landings to demersal species landings (in weight). Eutrophication and/or overexploitation are the key phenomena that can influence its trend.	De Leiva Mereno et al. 2000
Percentage of basal species
Percentage of cannibals
Percentage of herbivores
Percentage of intermediate species
Percentage of top predators
Predator-prey interaction strength	Communities dominated by weak interactions may be more stable and resistant to invasion.	Levins 1968; Cohen 1988
Primary production / total respiration	This is a descriptor of ecosystem maturity, where primary production is assumed to exceed total respiration in immature ecosystems, while in mature systems the ratio is closer to 1.	Odum & Barrett 1971; Christensen et al. 2008
Primary production required (PPR)	The proportion of the primary production needed to sustain the consumption by the trophic groups in an ecosystem.	Christensen & Pauly 1992
Reach of a biotic group	The fractional contribution of a biotic group to total consumer production.	Ruzicka et al. 2012
Redundancy	It refers to the energy flows along parallel pathways	Ulanowicz 1986
Schrondigers ratio	A measure of entropy production, the ratio between total respiration to total biomass.	Odum & Barrett 1971
Small Pelagic Fish stock/Phytoplankton Biomass		Yunev et al. 2017
Structural complexity	Accounts for structure, total production, connectivity, throughput, and information content of a system. The inverse of ascedancy.	Jorgensen 1992
Sum of all consumption		Christensen & Pauly 1992
Sum of all exports		Christensen & Pauly 1992
Sum of all flows into detritus		Christensen & Pauly 1992
Sum of all respiratory flows		Christensen & Pauly 1992
SURF (supportive role to fisheries) index	Quanitifes the role of different trophic groups as prey to higher trophic levels.	Plaganyi & Essington 2014
System omnivory index	The variance of the trophic levels found in a consumer's dietary contents. It is an index of trophic specialization showing how feeding interactions are distributed between trophic levels.	Christensen & Pauly 1992
System overhead	An indicator of the ecosystem's strength in reserve, represents the degrees of freedom a system has at its disposal to react to pertubations.	Ulanowicz 1986
System turnover rate	An indicator of the average size of organisms in an ecosystem.
Topological importance index (TI)	Quantifies the structural importance (centrality) of network nodes and the relative strength and asymmetry of interactions	Jordán et al. 2003
Total biomass
Total net primary production
Total primary productivity/total system respiration	Ratio close to 1 indicates mature ecosystems.	Odum & Barrett 1971
Total system biomass / total system throughput
Total system consumption/total system biomass
Total system production / total system biomass	It relates to community energetic attributes of ecosystem maturity. As system matures, biomass accumulates, therefore TPP/TB ratio is expected to be high in developing systems and diminish as the system mature.	Christensen & Pauly 1992
Total system respiration/total system biomass
Total system throughput	It refers to the total amount of flows exchanged in a network, and is the sum of the throughput of each compartment. It represents a useful measure of the activity and the size of the ecosystem.	Ulanowicz 1980
Transitivity index	The observed number of transitive triplets divided by possible number of transitive triplets. A measure of network closure or clustering, reflecting tendencies towards omnivory.	Johnson et al. 2009
Trophic diversity		Layman et al. 2007
Trophic importance	A measure of the overall effect on a foodweb due to changes in the abundance of a given species or trophic group.	Libralato et al. 2006
Trophic redundancy	Degree of dietary overlap among taxa within a food web.	Borrvall et al. 2000
Trophic skew	A re-organisation of trophic structure due to a change in the ratio of predator to prey richness.	Duffy 2003; Dobson et al. 2006
Uniformity of energy flows	The evenness of interactions between a consumer and the four resource guilds.	Maunsell et al. 2015
Upper connectance	The proportion of all prossible interspecific trophic interactions plus number of cmpetitive interactions	Yodzis 1980
Vulnerability	The mean number of consumer species per prey species. An index that is used to assess modifications of trophic network at species level.	Schoener 1989

## Sheet: Biodiversity indices
Index	Description	Short reference
Functional richness index
Gini-Simpson diversity index	Gives more weight to individuals of abundant species, unlike species richness that gives equal weight to all species.	Gini 1912; Simpson 1949
Hurlbert's expected number of species		Hurlbert 1971
Inverse Simpson's diversity index
Kepton's Q biodiveristy statistic index	It is an index of ecosystem scale biodiveristy. The metric represents the interdecile slope of the cummulative species log-abundance curve. It tracks changes in both eveness and richness. When adapted for ecosystem models, functional group biomass (sorted into bins) substitures for abundance and reflects both the evenss and richness component. It can be used to identify changes in biological comm…	Ainsworth & Pitcher 2006
Magalef's species richness index		Margalef 1958
Maximum cumulative number of species		Karakassis 1995
Number of species
Number of taxa
Pielou's eveness J'		Pielou 1977
Q90 biodiversity statistic
Rényi index		Rényi 1961
Second order diversity index	Allows calculation of community eveness.	Hill 1973
Shannon-Weaver index H'
Shannon's entropy fuction	It is an index of ecosystem scale biodiveristy. It is a composite metric representing both species evenness and species richness. When applied in Ecopath with Ecosym, the evenness component represents the distribution of biomass across functional groups. Hence, this index essentially represents a system's entropy.	Shannon 1948; Shannon and Weaver, 1949
Simpson diversity index
Species eveness E
Species richness R
Number of individuals
Index of Trophic Diversity (IDT)	Quantifies the relative contribution of the number of individuals of trophic groups relative to the total number of individuals	Danovaro et al. 2004

## Sheet: References
Short Reference	Full Reference
Ainsworth & Pitcher 2006	Ainsworth, C.H., and Pitcher T.J. (2006). Modifying Kempton's species diversity index for use with ecosystem simulation models. Ecological Indicators 6, 623-630.
Baird et al. 1998	Baird, D., Luczkovich, J., and Christian, R.R. (1998). Assessment of spatial and temporal variability in ecosystem attributes of the St. Marks National Wildlife Refuge, Apalache Bay, Florida. Estuar. Coast. Shelf Sci. 47, 329-349.
Bascompte et al. 2006	Bascompte, J., P. Jordano, and J. M. Olesen. (2006). Asymmetric coevolutionary networks facilitate biodiversity maintenance. Science 312:431–433.
Berglund et al. 2007	Berglund, J., Müren, U., Båmstedt, U., and Andersson, A. (2007). Efficiency of a phytoplankton-based and a bacteria-based food web in a pelagic marine system. Limnol Oceanogr 52, 121-131.
Borrvall et al. 2000	Borrvall, C., Ebenman, B., and Tomas Jonsson, T.J. (2000). Biodiversity lessens the risk of cascading extinction in model food webs. Ecol Lett 3, 131–136.
Christensen & Pauly 1992	Christensen, V., and Pauly, D. (1992). ECOPATH II—a software for balancing steady-state ecosystem models and calculating network characteristics. Ecological modelling, 61(3-4), pp.169-185.
Christensen & Walters 2004	Christensen, V., and Walters, C.J. (2004). Ecopath with Ecosim: methods, capabilities and limitations. Ecological modelling, 172(2-4), pp.109-139.
Christensen 1995	Christensen, V. (1995). Ecosystem maturity—towards quantification. Ecological modelling, 77(1), pp.3-32.
Christensen et al. 2008	Christensen, V., Walters, C., Pauly, D., and Forrest, R. 2008. Ecopath with Ecosim 6: A user’s guide. Fisheries Centre, University of British Columbia, Vancouver.
Cohen & Briand 1984	Cohen, J. E., and Briand, F. (1984). Trophic links of community food webs. Proceedings of the National Academy of Sciences, 81(13), 4105-4109.
Cohen 1988	Cohen, J.E. (1988). "Food webs and community structure", in Perspectives in Ecological Theory, eds. J. Roughgarden, R. M. May, and S. A. Levin (Princeton, New Jersey: Princeton University Press), 181-202.
Danovaro et al. 2004	Danovaro, R., Dell’Anno, A., and Pusceddu, A. (2004). Biodiversity response to climate change in a warm deep sea. Ecol Let 7(9), 821-828.
De Leina Moreno et al. 2000	De Leiva Moreno, J. I., Agostini V. N., Caddy J. F., and Carocci F. (2000). Is the pelagic-demersal ratio from fishery landings a useful proxy for nutrient availability? A preliminary data exploration for the semi-closed seas around Europe. ICES J. Mar. Sci. 57, 1091-1102.
Dobson et al. 2006	Dobson, A., Lodge, D., Alder, J., Cumming, G.S., Keymer, J., et al. (2006). Habitat loss, trophic collapse, and the decline of ecosystem services. Ecology 87, 1915–1924.
Duffy 2003	Duffy, J.E. (2003). Biodiversity loss, trophic skew and ecosystem functioning. Ecology Letters 6, 680–687.
Finn 1976	Finn, J.T. (1976). Measures of ecosystem structure and function derived from analysis of flows. Journal of theoretical Biology, 56(2), pp.363-380.
Folke et al. 2004	Folke, C., Carpenter, S., Walker, B., Scheffer, M., Elmqvist, T., Gunderson, L. and Holling, C.S. (2004). Regime shifts, resilience, and biodiversity in ecosystem management. Annu Rev Ecol Evol Syst 35, 557-581.
Fridley 2001	Fridley, J.D. (2001). The influence of species diversity on ecosystem productivity: how, where, and why?. Oikos 93(3), 514-526.
Gardner & Ashby 1970	Gardner, M.R., and Ashby, W.R. (1970). Connectance of large dynamic (cybernetic) systems: critical values for stability. Nature, 228(5273), pp.784-784.
Guimera & Amaral 2005	Guimera, R., and Amaral, L.A.N. (2005). Functional cartography of complex metabolic networks. Nature, 433(7028),895-900.
Hairston et al. 1960	Hairston, N.G., Smith, F.E., and Slobodkin, L.B. (1960). Community structure, population control, and competition. Am. Nat. 44, 421–425
Halpern et al. 2012	Halpern, B.S., Longo, C., Hardy, D., McLeod, K.L., Samhouri, J.F., Katona, S.K., Kleisner, K., Lester, S.E., O'Leary, J., Ranelletii, M., and Rosenberg, A.A. (2012). An index to assess the health and benefits of the global ocean. Nature, 488(7413), 615-620.
Hill 1973	Hill, M.O. (1973). Diversity and eveness a unifying notation and its consequences. Ecology 54, 427-432.
Hulbert 1978	Hurlbert, S.H. (1978). The measurement of niche overlap and some relatives. Ecology, 59(1), pp.67-77.
Hurlbert 1971	Hurlbert, S.H. (1971). The non-concept of species diversity: a critique and alternative parameters. Ecology 52, 577-586.
Hurlbert 1997	Hurlbert, S.H. (1997). Functional importance vs keystoneness: reformulating some questions in theoretical biocenology. Aust J Ecol 22(4), 369-382.
Jacobs 1974	Jacobs, J. (1974). Quantitative measurement of food selection. Oecologia, 14(4), pp.413-417.
Johnson et al. 2009	Johnson, J.C., Luczkovich, J.J., Borgatti, S.P. and Snijders, T.A. (2009). Using social network analysis tools in ecology: Markov process transition models applied to the seasonal trophic network dynamics of the Chesapeake Bay. Ecol Model 220(22), 3133-3140.
Jordán et al. 1999	Jordán, F., Takács-Sánta, A., and Molnár, I. (1999). A reliability theoretical quest for keystones. Oikos, pp.453-462.
Jordán et al. 2003	Jordán, F., Liu, W.C., and Van Veen, F.J.F. (2003). Quantifying the importance of species and their interactions in a host-parasitoid community. Com Ecol 4(1), 79-88.
Jorgensen 1992	Jorgensen, S.E. (1992). Exergy and ecology. Ecol. Model. 63, 185–214.
Karakassis 1995	Karakassis, J. (1995). S: a new method for calculating macrobenthic species richness. Marine Ecology Progress Series, 120, 299-303.
Kay et al. 1989	Kay, J.J., Graham, L.A., and Ulanowicz, R.E. (1989). A detailed guide to network analysis. In Network analysis in marine ecology (pp. 15-61). Springer, Berlin, Heidelberg.
Layman et al. 2007	Layman, C.A., Arrington, D.A., Montaña, C.G., and Post, D.M. (2007). Can stable isotope ratios provide for community‐wide measures of trophic structure? Ecology 88(1), 42-48.
Levins 1968	Levins, R. (1968). Evolution in changing environments: some theoretical explorations (No. 2). Princeton University Press.
Libralato et al. 2006	Libralato, S., Christensen, V., and Pauly, D. (2006). A method for identifying keystone species in food web models. Ecological Modelling, 195(3-4), pp.153-171.
Libralato et al. 2008	Libralato, S., Coll, M., Tudela, S., Palomera, I., and Pranovi, F. (2008). Novel index for quantification of ecosystem effects of fishing as removal of secondary production. Marine Ecology Progress Series, 355, pp.107-129.
Lindeman 1942	Lindeman, R.L. (1942). The trophic-dynamic aspect of ecology. Ecology 23, 399–417.
Margalef 1958	Margalef, R. (1958). Information theory in ecology. General Systematics, 3, 36–71.
Martinez 1991	Martinez, N.D. (1991). Artifacts or attributes? Effects of resolution on the Little Rock Lake food web. Ecological monographs, 61(4), pp.367-392.
Maunsell et al. 2015	Maunsell, S.C., Kitching, R.L., Burwell, C.J., and Morris, R.J. (2015). Changes in host-parasitoid food web structure with elevation. J Anim Ecol 84, 353–63.
Montoya et al. 2006	Montoya, J.M., Pimm S.L., Solé, R.V. (2006). Ecological networks and their fragility. Nature 442, 259–264
Newman 2002	Newman, M.E. (2002). Assortative mixing in networks. Phys. Rev. Lett. 89, 208701.
Odum & Barrett 1971	Odum, E.P., and Barrett, G.W. (1971). Fundamentals of ecology (Vol. 3, p. 5). Philadelphia: Saunders.
Odum 1969	Odum, E.P. (1969). The strategy of ecosystem development. Science 164, 262–270.
Pauly et al. 1998	Pauly, D., Hart, P. J., and Pitcher, T. J. (1998). “Speaking for themselves: new acts, new actors and a New Deal in a reinvented fisheries management”, In Reinventing fisheries management. Dordrecht: Springer, 409-415.
Pielou 1977	Pielou, E.C. (1977). Mathematical ecology. New York: J. Wiley & Sons, 385 pp.
Plaganyi & Essington 2014	Plaganyi, E.E., and Essington, T.E. (2014). When the SURFs up, forage fish are key. Fisheries Research 159, 68–74.
Rényi 1961	Rényi, A. (1961). On measures of entropy and information. In Proceedings of the Fourth Berkeley Symposium on Mathematical Statistics and Probability, Volume 1: Contributions to the Theory of Statistics. The Regents of the University of California.
Ruzicka et al. 2012	Ruzicka, J.J., Brodeur, R.D., Emmett, R.L., Steele, J.H., Zamon, J.E., Morgan, C.A., Thomas, A.C., et al., (2012). Interannual variability in the Northern California current food web structure: changes in energy flow pathways and the role of forage fish, euphausiids, and jellyfish. Prog Oceanogr 102, 19–41.
Schoener 1989	Schoener, T.W. (1989). Food webs from the small to the large: the Robert H. MacArthur Award Lecture. Ecology, 70(6), pp.1559-1589.
Shannon & Cury 2004	Shannon, L.J., and Cury, P.M. (2004). Indicators quantifying small pelagic fish interactions: application using a trophic model of the Southern Benguela ecosystem. Ecol. Indic. 3, 305e321.
Sosa-Lopez et al. 2005	Sosa-Lopez A., Mouillot D., Do Chi T., and Ramos-Miranda, J. (2005). Ecological indicators based on fish biomass distribution along trophic levels: an application to the Terminos coastal lagoon, Mexico. ICES J Mar Sci 62, 453-458.
Stoufer et al. 2006	Stouffer, D.B., Camacho, J., and Amaral, L.A.N. (2006). A robust measure of food web intervality. Proceedings of the National Academy of Sciences, 103(50), pp.19015-19020.
Thibault et al. 2017	Thibaut, T., Blanfuné, A., Boudouresque, C. F., Personnic, S., Ruitton, S., Ballesteros, E., ..., and Cheminée, A. (2017). An ecosystem-based approach to assess the status of Mediterranean algae-dominated shallow rocky reefs. Marine Pollution Bulletin, 117(1-2), 311-329.
Ulanowicz & Puccia 1990	Ulanowicz, R.E., and Puccia, C.J. (1990). Mixed trophic impacts in ecosystems. Coenoses, pp.7-16.
Ulanowicz 1980	Ulanowicz, R.E. (1980). An hypothesis on the development of natural communities. Journal of theoretical Biology, 85(2), pp.223-245.
Ulanowicz 1986	Ulanowicz, R.E. (1986). Growth and development: ecosystems phenomenology. Springer, Berlin.
Ulanowicz 1995	Ulanowicz, R.E. (1995). "Ecosystem trophic foundations: Lindeman exonerata", in Complex ecology: the part-whole relation in ecosystems, eds. B.C. Patten, S. Jorgensen (Upper Saddle River, NJ: Prentice-Hall), p 549−560.
Ward & Myers 2005	Ward, P., Myers, R. (2005). Shifts in open-ocean fish communities coinciding with the commencement of commercial fishing. Ecology 86(4), 835-847.
Wasserman & Faust 1994	Wasserman, S., and Faust, K. (1994). Social Network Analysis: Methods and Applications. Cambridge, UK: Cambridge University Press.
Watts & Strogatz 1998	Watts, D.J., and Strogatz, S.H. (1998). Collective dynamics of ‘small-word’ networks. Lett. Nat. 393, 440–442.
Wulff et al. 1989	Wulff, F., Field, J.G., and Mann, K.H. (1989). Network analysis in marine ecology methods and applications. Coastal and Estuarine Studies 32, Springer, Heidelberg.
Yodzis 1980	Yodzis, P. (1980). The connectance of real ecosystems. Nature, 284(5756), pp.544-545.
Yunev et al. 2017	Yunev, O.A., Velikova, V., and Carstensen J. (2017). Effects of changing nutrient inputs on the ratio of small pelagic fish stock and phytoplankton biomass in the Black Sea. Estuar. Coast. Shelf Sci. 197, 173-184.
